CORRECTION

# Correction: Where to Go: Breaking the Symmetry in Cell Motility

The *PLOS Biology* Staff

## Notice of Republication

This article was republished on June 10, 2016, to correct errors in the references that were introduced during the typesetting process. Please download this article again to view the correct version. The originally published, uncorrected article and the republished, corrected article are provided here for reference.

## Supporting Information

**S1 File. Originally published, uncorrected article.**  
(PDF)

**S2 File. Republished corrected article.**  
(PDF)

## Reference

1. Huang S (2016) Where to Go: Breaking the Symmetry in Cell Motility. *PLoS Biol* 14(5): e1002463. doi:[10.1371/journal.pbio.1002463](https://doi.org/10.1371/journal.pbio.1002463) PMID: [27196433](https://pubmed.ncbi.nlm.nih.gov/27196433/)

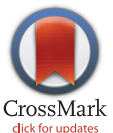

---

## OPEN ACCESS

**Citation:** The *PLOS Biology* Staff (2016) Correction: Where to Go: Breaking the Symmetry in Cell Motility. *PLoS Biol* 14(6): e1002510. doi:[10.1371/journal.pbio.1002510](https://doi.org/10.1371/journal.pbio.1002510)

**Published:** June 22, 2016

**Copyright:** © 2016 The PLOS Biology Staff. This is an open access article distributed under the terms of the [Creative Commons Attribution License](https://creativecommons.org/licenses/by/4.0/), which permits unrestricted use, distribution, and reproduction in any medium, provided the original author and source are credited.
